# Supplementary material for: Integrative Analysis Reveals Subtype-Specific Regulatory Determinants in Triple Negative Breast Cancer
Source: MDPI journal article supplement (doi:10.3390/cancers11040507), 2019-04-10

# Supplementary Materials: Integrative Analysis Reveals Subtype-Specific Regulatory Determinants in Triple Negative Breast Cancer

Shujun Huang, Wayne Xu, Pingzhao Hu and Ted M. Lakowski

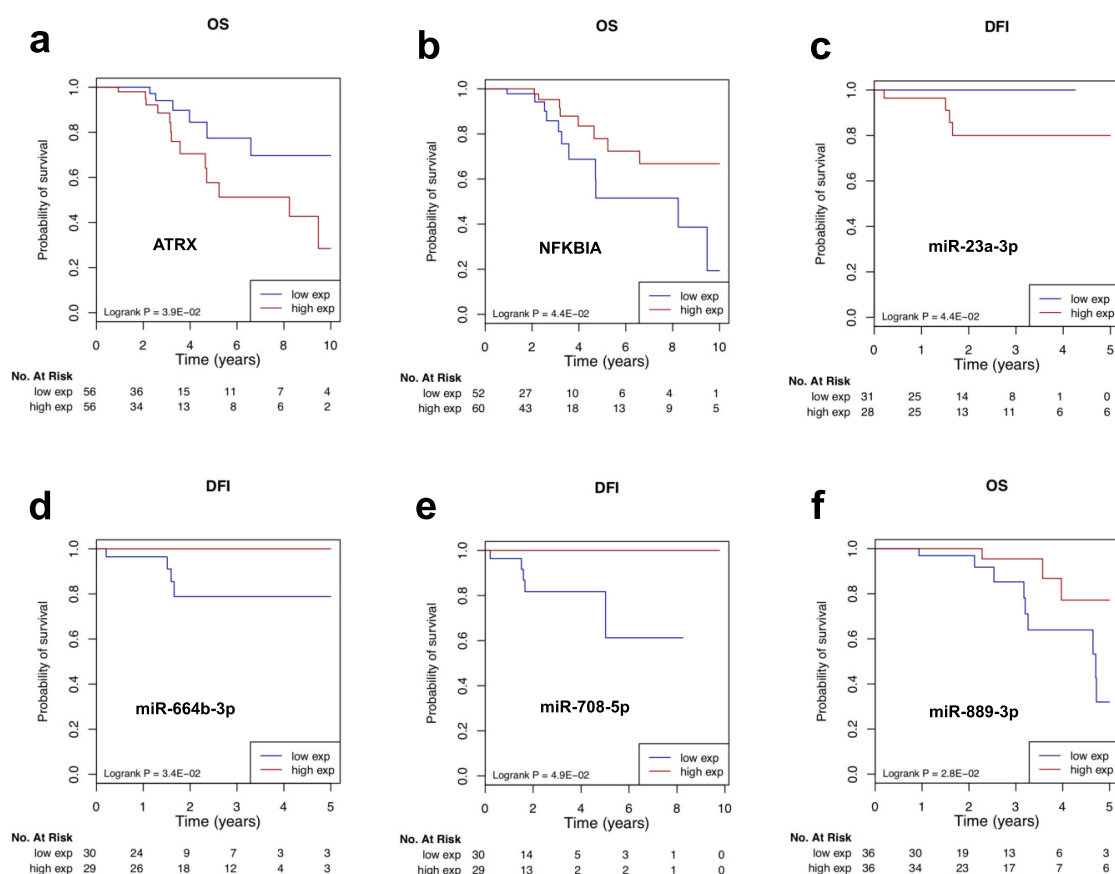

**Figure S1.** Survival analysis of the TNBC regulators in TNBCs. Based on gene expression levels of a given regulator, TN patients from TCGA were divided into over-expressed (“high-exp”, red line) and down-expressed (“low-exp”, blue line) groups. Survival analysis with different endpoints (OS, DSS, PFI, DFI) was performed for each regulator. Only significant results were shown. 8 regulators alone could be a prognostic marker for TNBC patients: (a) ATRX, (b) NFKBIA, (c) hsa-miR-23a-3p, (d) hsa-miR-664b-3p, (e) hsa-miR-708-5p, and (f) hsa-miR-889-3p. OS, overall survival; DSS, disease-specific survival; PFI, progression-free interval; DFI, disease-free interval.

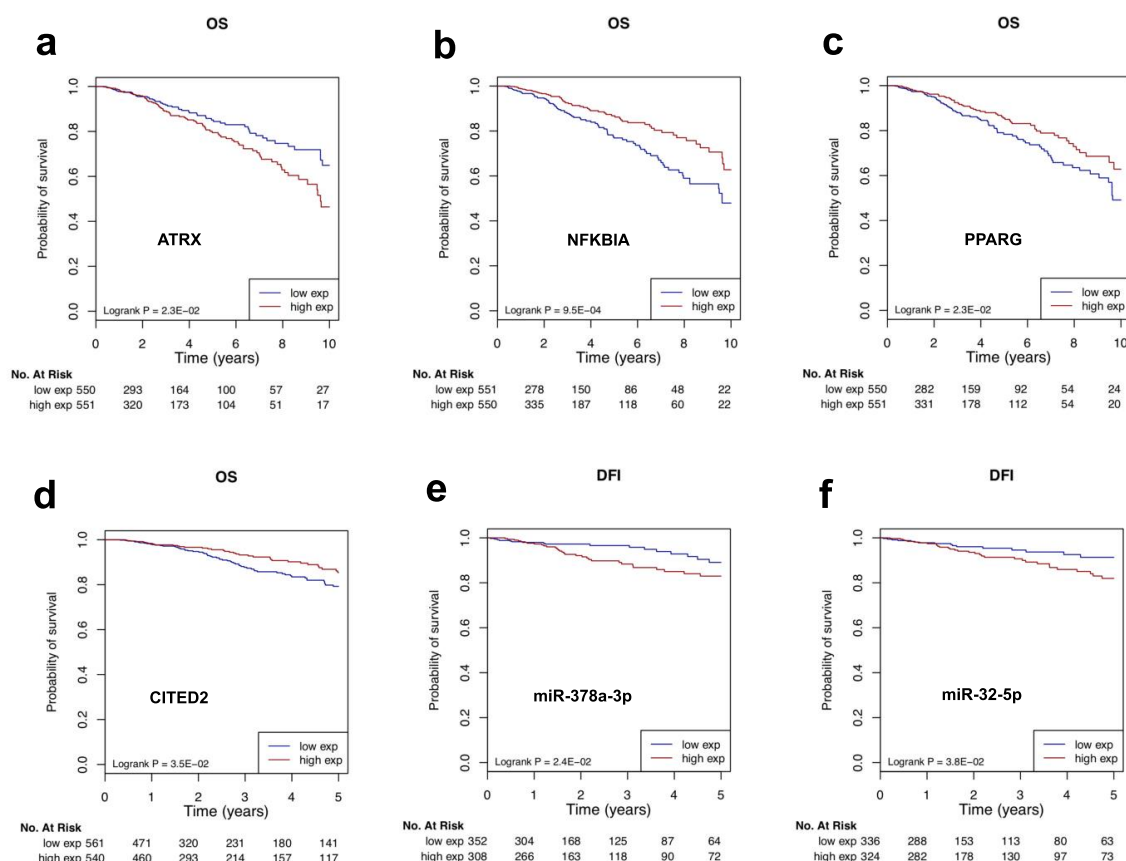

**Figure S2-1.** Survival analysis of the TNBC regulators in BCs. Based on gene expression levels of a given regulator, BC patients from TCGA were divided into over-expressed (“high-exp”, red line) and down-expressed (“low-exp”, blue line) groups. Survival analysis with different endpoints (OS, DSS, PFI, DFI) was performed for each regulator. Only significant results were shown. 11 regulators alone could be a prognostic marker for BC patients (six were shown here): (a) ATRX, (b) NFKBIA, (c) PPARG, (d) CITED2, (e) hsa-miR-378a-3p, and (f) hsa-miR-32-5p. OS, overall survival; DSS, disease-specific survival; PFI: progression-free interval; DFI, disease-free interval.

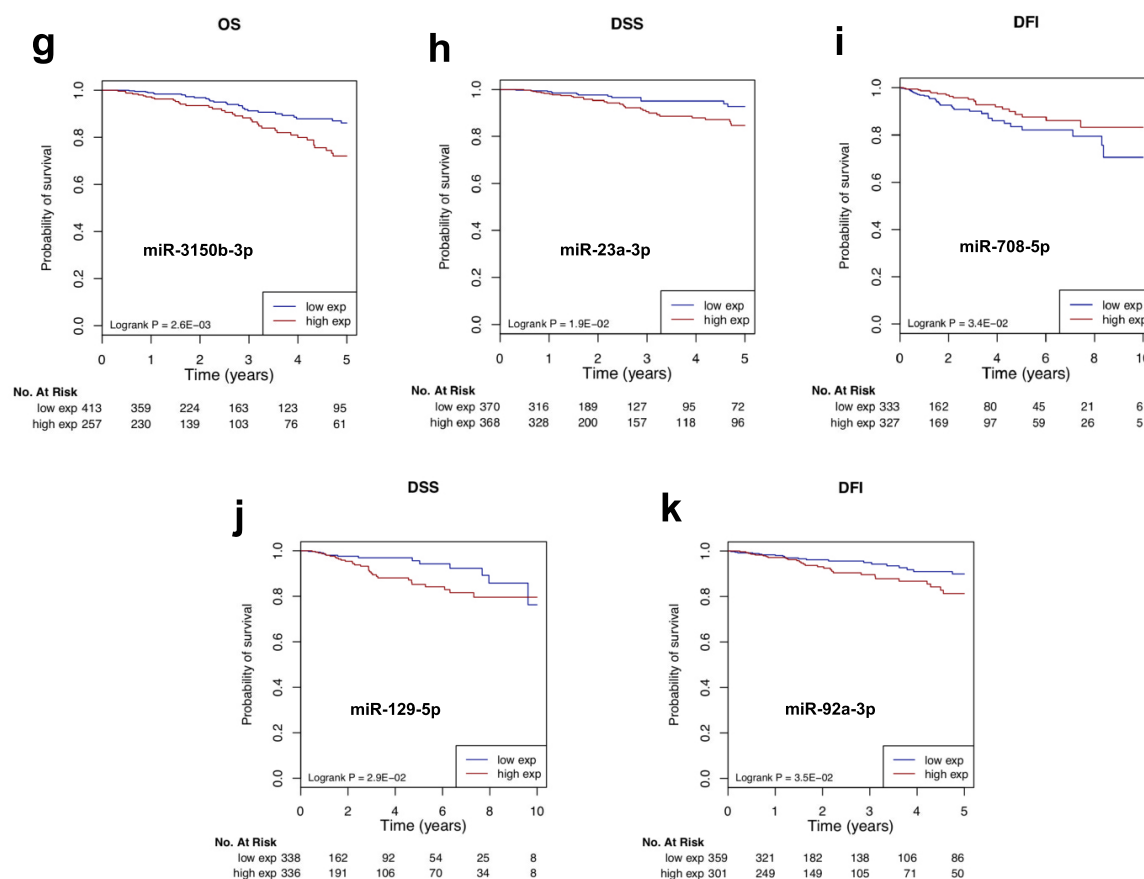

**Figure S2-2.** Survival analysis of the TNBC regulators in BCs. Based on gene expression levels of a given regulator, BC patients from TCGA were divided into over-expressed (“high-exp”, red line) and down-expressed (“low-exp”, blue line) groups. Survival analysis with different endpoints (OS, DSS, PFI, DFI) was performed for each regulator. Only significant results were shown. 11 regulators alone could be a prognostic marker for BC patients (five were shown here): (**g**) hsa-miR-3150b-3p, (**h**) hsa-miR-23a-3p, (**i**) hsa-miR-708-5p, (**j**) hsa-miR-129-5p, and (**k**) hsa-miR-92a-3p. OS, overall survival; DSS, disease-specific survival; PFI: progression-free interval; DFI, disease-free interval.

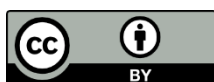

Supplement: s1 [file s1]
